# Supplementary material for: Determination and Analysis of Ustiloxins A and B by LC-ESI-MS and HPLC in False Smut Balls of Rice
Source: Int J Mol Sci. 2012 Sep 10;13(9):11275–87. doi: 10.3390/ijms130911275 (PMC3472744; doi:10.3390/ijms130911275)

# Supplementary Materials

**Figure S1.** HR-ESI-MS spectrum of compound **1** (ustiloxin A).

## Analysis Info

Analysis Name 12051040\_20120528\_000002.d  
Sample Uvf-6  
Comment ESI Positive

Acquisition Date 5/28/2012 11:09:23 AM  
Instrument Bruker Apex IV FTMS  
Operator Peking University

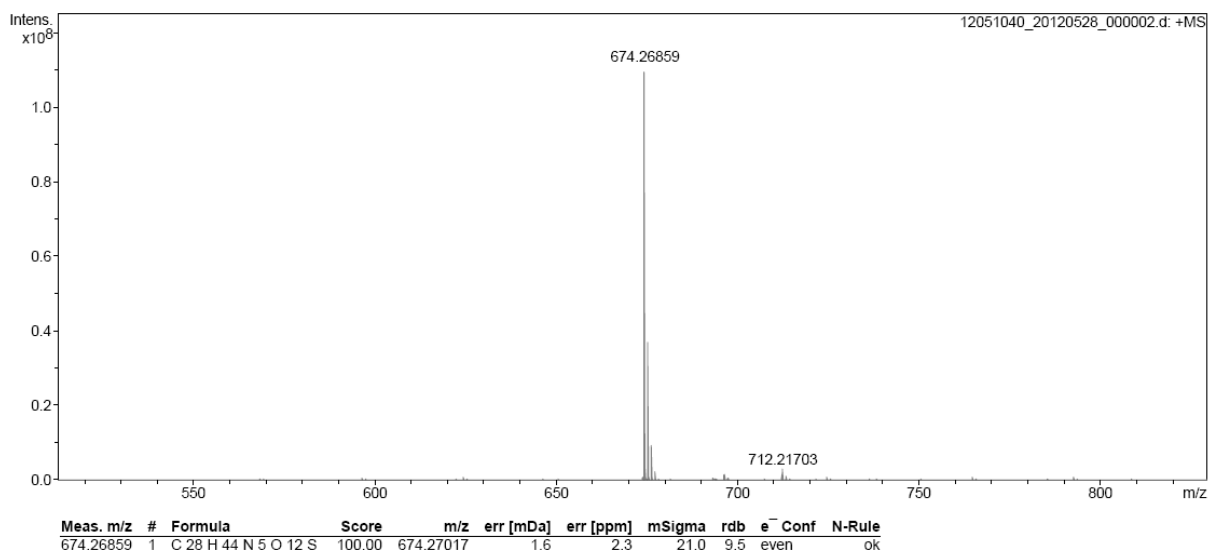

**Figure S2.** <sup>1</sup>H NMR spectrum of compound **1** (ustiloxin A).

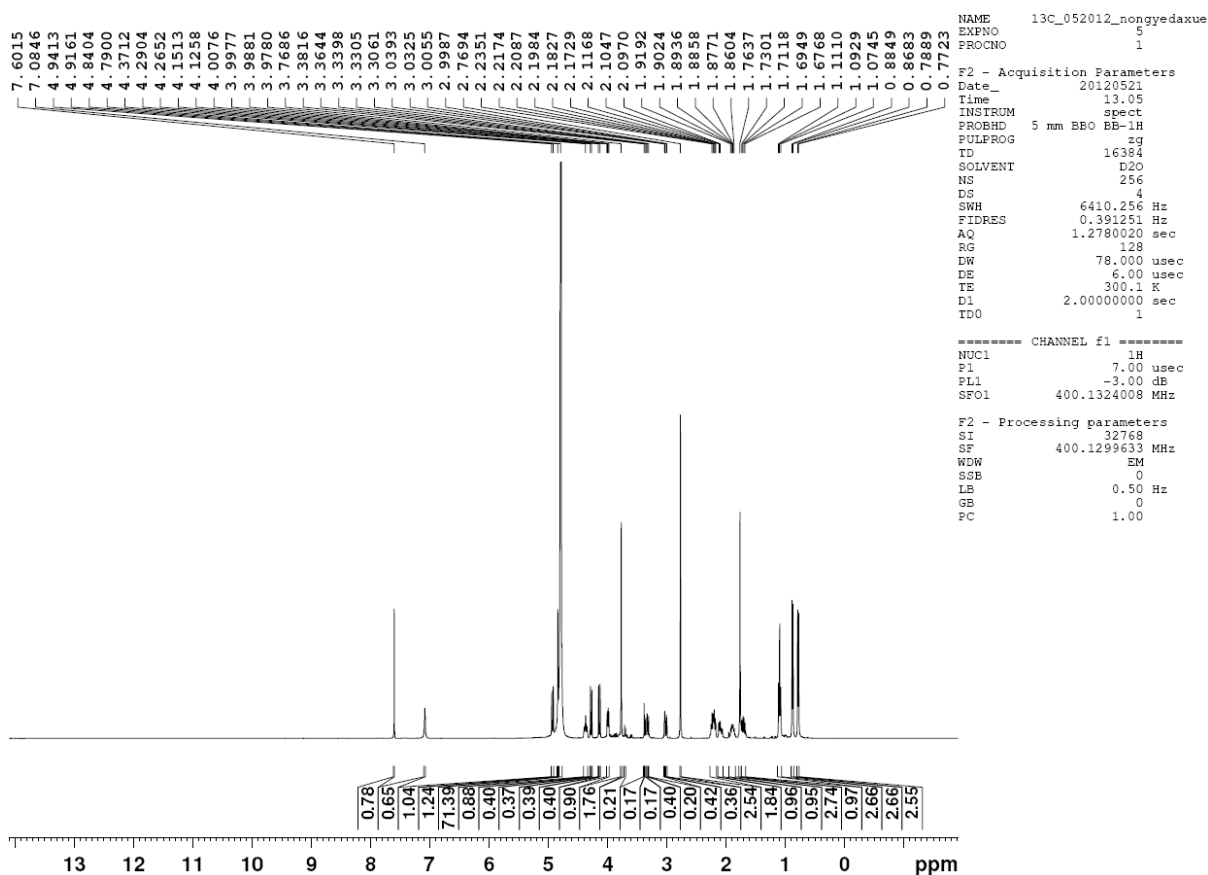

**Figure S3.**  $^{13}\text{C}$  NMR spectrum of compound **1** (ustiloxin A).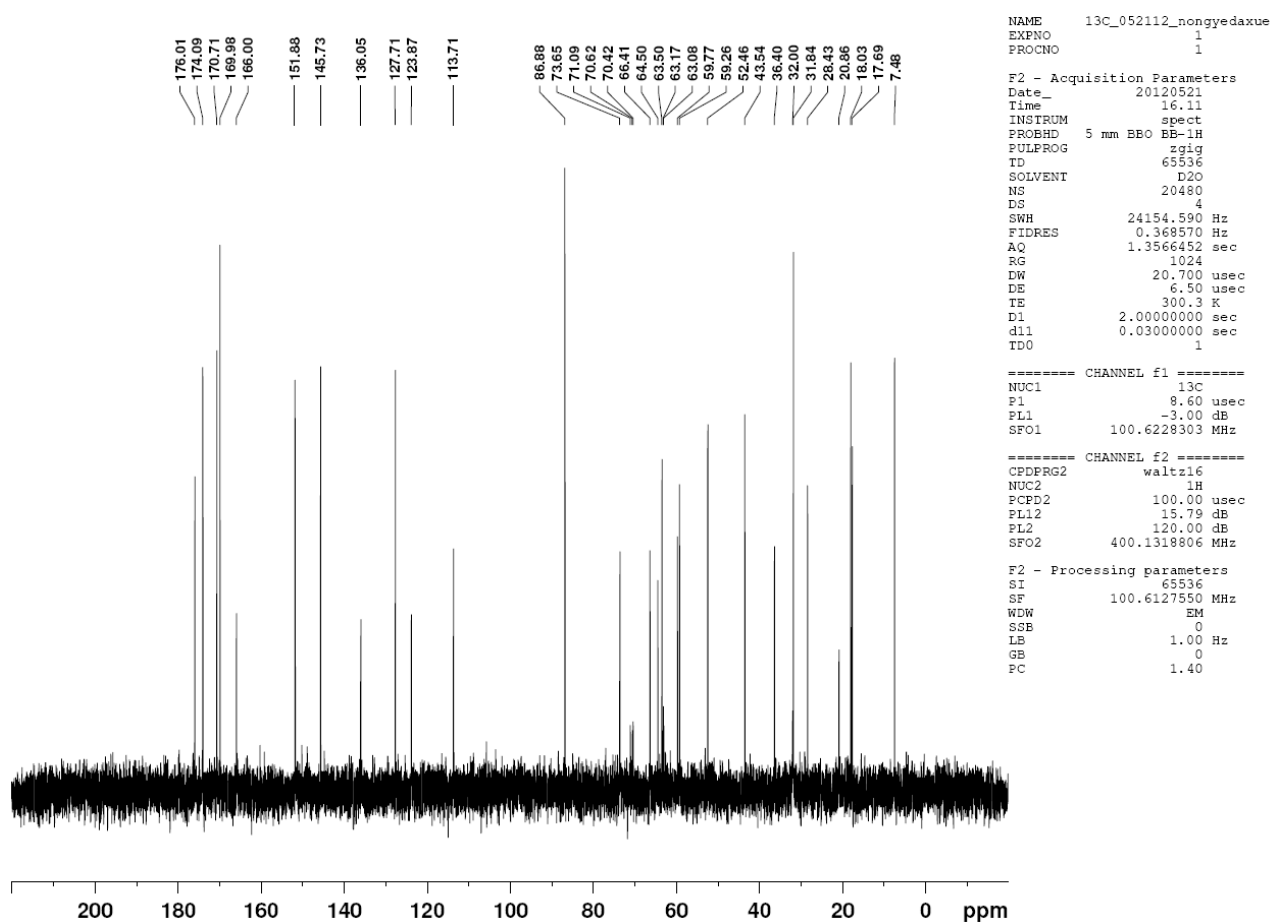**Figure S4.** HR-ESI-MS spectrum of compound **2** (ustiloxin B).**Analysis Info**

Analysis Name 12051039\_20120528\_000001.d  
 Sample Uvf-5  
 Comment ESI Positive

Acquisition Date 5/28/2012 11:05:37 AM  
 Instrument Bruker Apex IV FTMS  
 Operator Peking University

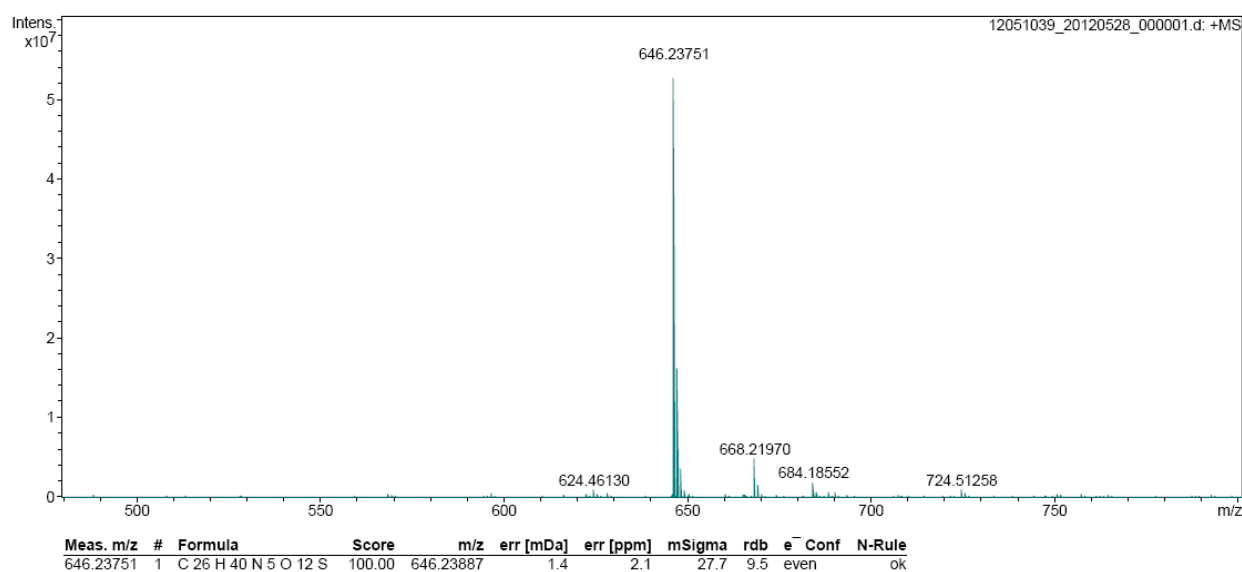

Figure S5.  $^1\text{H}$  NMR spectrum of compound 2 (ustiloxin B).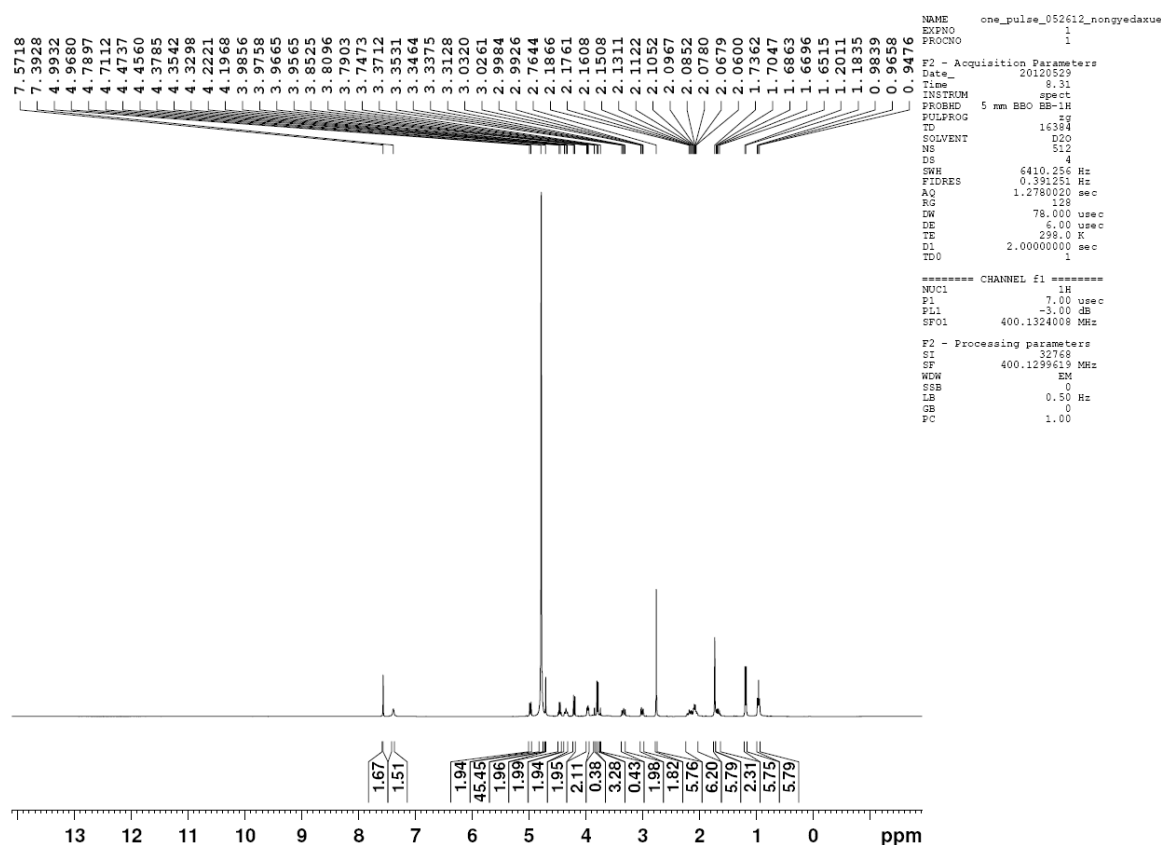Figure S6.  $^{13}\text{C}$  NMR spectrum of compound 2 (ustiloxin B).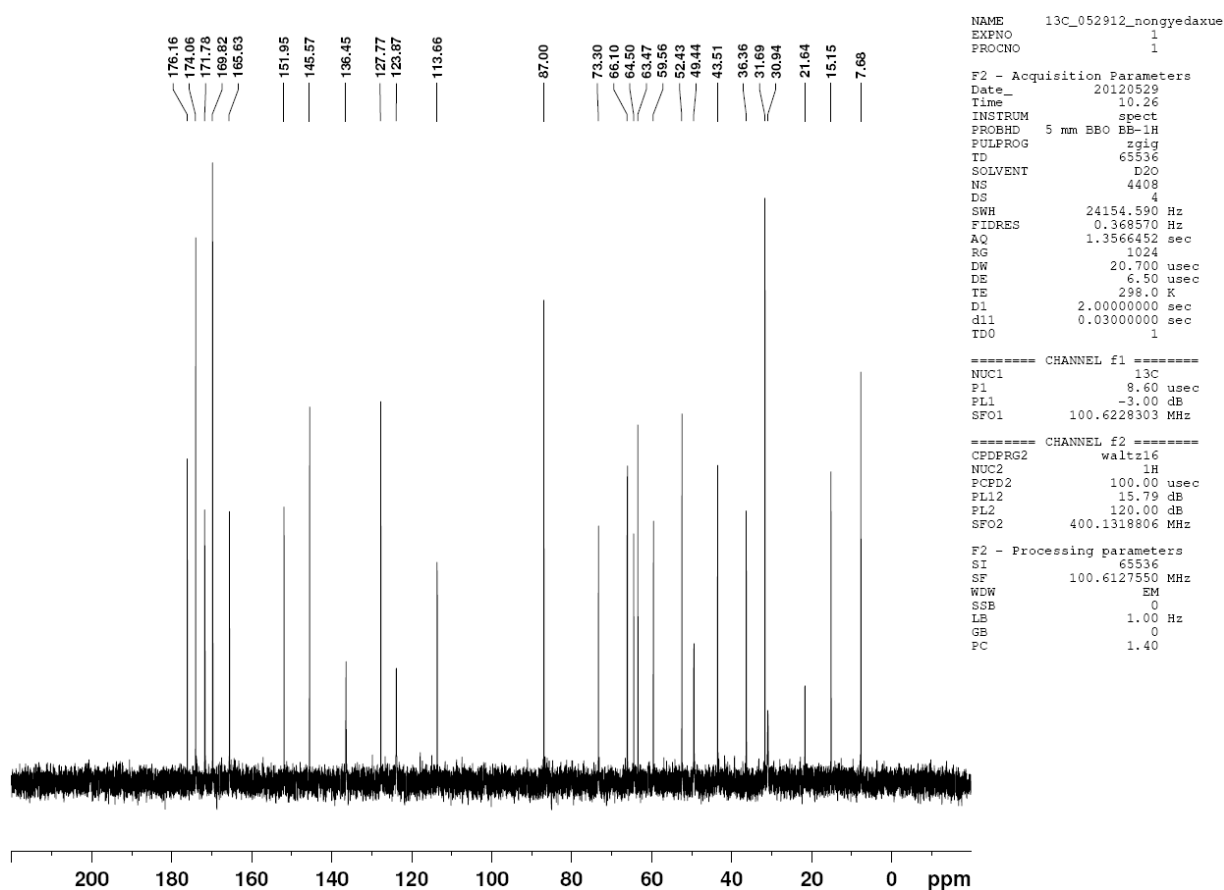

Supplement: Supplementary file 1 [file ijms-13-11275-s001.pdf]
